# Supplementary material for: Novel aluminum–BODIPY dyads: intriguing dual-emission via photoinduced energy transfer
Source: Royal Society of Chemistry journal article supplement (doi:10.1039/c5dt05067g), 2016-01-01
Supplement: c5dt05067g1.pdf [file c5dt05067g1.pdf]

## Electronic Supplementary Information

### Novel Aluminum-BODIPY Diads: Intriguing Dual-Emission via Photoinduced Energy Transfer

Changho Sohn,<sup>a</sup> Jisu Jeong,<sup>b</sup> Ji Hye Lee,<sup>a</sup> Byung Hoon Choi,<sup>a</sup> Hyonseok Hwang,<sup>a</sup> Gyun-Tack Bae,<sup>c</sup>  
Kang Mun Lee<sup>a,\*</sup> and Myung Hwan Park<sup>c,\*</sup>

<sup>a</sup> Department of Chemistry, Institute for Molecular Science and Fusion Technology, Kangwon National University, Chuncheon, Gangwon 24341, Republic of Korea

<sup>b</sup> Department of Chemistry, KAIST, Daejeon 34141, Republic of Korea.

<sup>c</sup> Department of Chemistry Education, Chungbuk National University, Cheongju, Chungbuk 28644, Republic of Korea.

**Table S1** Crystallographic data and parameters for **6–8**.

| Compound                                                    | <b>6</b> ·(C <sub>4</sub> H <sub>10</sub> O)                                     | <b>7</b> ·(C <sub>4</sub> H <sub>10</sub> O)                                     | <b>8</b>                                                                         |
|-------------------------------------------------------------|----------------------------------------------------------------------------------|----------------------------------------------------------------------------------|----------------------------------------------------------------------------------|
| formula                                                     | C <sub>51</sub> H <sub>66</sub> BF <sub>2</sub> N <sub>4</sub> O <sub>4</sub> Al | C <sub>51</sub> H <sub>64</sub> BF <sub>4</sub> N <sub>4</sub> O <sub>4</sub> Al | C <sub>35</sub> H <sub>26</sub> BF <sub>2</sub> N <sub>4</sub> O <sub>3</sub> Al |
| formula weight                                              | 874.87                                                                           | 910.85                                                                           | 626.39                                                                           |
| crystal system                                              | Triclinic                                                                        | Triclinic                                                                        | Triclinic                                                                        |
| space group                                                 | <i>P</i> <sub>1</sub>                                                            | <i>P</i> <sub>1</sub>                                                            | <i>P</i> <sub>1</sub>                                                            |
| <i>a</i> (Å)                                                | 11.6723(16)                                                                      | 12.038(2)                                                                        | 10.378(2)                                                                        |
| <i>b</i> (Å)                                                | 13.9091(16)                                                                      | 14.150(3)                                                                        | 11.375(2)                                                                        |
| <i>c</i> (Å)                                                | 15.8713(19)                                                                      | 16.086(3)                                                                        | 14.101(3)                                                                        |
| $\alpha$ (°)                                                | 103.271(7)                                                                       | 102.959(14)                                                                      | 84.83(3)                                                                         |
| $\beta$ (°)                                                 | 99.123(8)                                                                        | 99.494(14)                                                                       | 71.22(3)                                                                         |
| $\gamma$ (°)                                                | 91.663(9)                                                                        | 92.294(14)                                                                       | 86.52(3)                                                                         |
| <i>V</i> (Å <sup>3</sup> )                                  | 2470.4(5)                                                                        | 2625.2(9)                                                                        | 1568.7(5)                                                                        |
| <i>Z</i>                                                    | 2                                                                                | 2                                                                                | 2                                                                                |
| $\rho_{\text{calc}}$ (g cm <sup>-3</sup> )                  | 1.176                                                                            | 1.152                                                                            | 1.326                                                                            |
| $\mu$ (mm <sup>-1</sup> )                                   | 0.095                                                                            | 0.097                                                                            | 0.119                                                                            |
| <i>F</i> (000)                                              | 936                                                                              | 968                                                                              | 648                                                                              |
| <i>T</i> (K)                                                | 296                                                                              | 296                                                                              | 293                                                                              |
| <i>hkl</i> range                                            | -13 → +13,<br>-15 → +15,<br>-17 → +17                                            | -11 → +11,<br>-13 → +13,<br>-15 → +13                                            | 0 → +14,<br>-16 → +16,<br>-19 → +20                                              |
| measd reflns                                                | 24006                                                                            | 17625                                                                            | 8735                                                                             |
| unique reflns [ <i>R</i> <sub>int</sub> ]                   | 7360 [0.0796]                                                                    | 5045 [0.0561]                                                                    | 8735 [0.0671]                                                                    |
| reflns used for refinement                                  | 7360                                                                             | 5045                                                                             | 8735                                                                             |
| refined parameters                                          | 582                                                                              | 631                                                                              | 418                                                                              |
| <i>R</i> 1 <sup><i>a</i></sup> ( <i>I</i> > 2σ( <i>I</i> )) | 0.0532                                                                           | 0.0537                                                                           | 0.0706                                                                           |
| w <i>R</i> 2 <sup><i>b</i></sup> all data                   | 0.1634                                                                           | 0.1615                                                                           | 0.2340                                                                           |
| GOF on <i>F</i> <sup>2</sup>                                | 1.024                                                                            | 1.063                                                                            | 1.031                                                                            |
| $\rho_{\text{fin}}$ (max/min) (e Å <sup>-3</sup> )          | 0.498, -0.351                                                                    | 0.257, -0.197                                                                    | 0.786, -0.565                                                                    |

<sup>*a*</sup>  $R1 = \frac{\sum ||F_o| - |F_c||}{\sum |F_o|}$ . <sup>*b*</sup>  $wR2 = \left\{ \frac{[\sum w(F_o^2 - F_c^2)^2]}{[\sum w(F_o^2)^2]} \right\}^{1/2}$ .

**Table S2** Selected bond lengths (Å) and angles (°) for **6–8**.

|               | <b>6</b>   | <b>7</b>   | <b>8</b>                |
|---------------|------------|------------|-------------------------|
|               |            | Lengths    |                         |
| Al–O(1)       | 1.794(2)   | 1.788(3)   | 1.790(15)               |
| Al–O(2)       | 1.781(2)   | 1.802(3)   | 1.800(14)               |
| Al–O(3)       | 1.757(2)   | 1.786(3)   | 1.762(14)               |
| Al–N(1)       | 2.000(3)   | 2.003(3)   | 2.039(16)               |
| Al–N(2)       | 1.990(3)   | 2.004(3)   | 2.057(16)               |
| B–N(3)        | 1.528(5)   | 1.545(7)   | 1.546(3)                |
| B–N(4)        | 1.536(5)   | 1.554(7)   | 1.550(3)                |
| B–F(1)        | 1.390(4)   | 1.399(5)   | 1.383(2)                |
| B–F(2)        | 1.394(4)   | 1.392(6)   | 1.391(2)                |
| O(1)–C(1)     | 1.321(4)   | 1.339(4)   | 1.342(2)                |
| O(2)–C(16)    | 1.329(4)   | 1.341(5)   | 1.339(2) <sup>a</sup>   |
| O(3)–C(33)    | 1.341(4)   | 1.350(4)   | 1.328(2) <sup>b</sup>   |
|               |            | Angles     |                         |
| O(3)–Al–O(1)  | 102.30(11) | 111.52(14) | 120.29(7)               |
| O(3)–Al–O(2)  | 110.10(11) | 101.99(13) | 122.68(7)               |
| O(2)–Al–O(1)  | 91.97(10)  | 92.39(13)  | 117.02(7)               |
| O(3)–Al–N(2)  | 93.88(11)  | 106.82(14) | 94.55(7)                |
| O(2)–Al–N(2)  | 89.41(11)  | 89.53(14)  | 84.38(6)                |
| O(1)–Al–N(2)  | 162.17(12) | 140.27(14) | 92.26(6)                |
| O(3)–Al–N(1)  | 107.86(11) | 92.54(13)  | 93.39(7)                |
| O(2)–Al–N(1)  | 140.88(11) | 163.76(14) | 90.28(6)                |
| O(1)–Al–N(1)  | 88.94(11)  | 88.94(14)  | 84.81(6)                |
| N(2)–Al–N(1)  | 78.91(11)  | 79.23(15)  | 171.97(6)               |
| Al–O(1)–C(1)  | 132.6(2)   | 135.2(2)   | 115.84(11)              |
| Al–O(2)–C(16) | 134.1(2)   | 132.6(2)   | 116.22(11) <sup>c</sup> |
| Al–O(3)–C(33) | 132.2(2)   | 132.1(3)   | 132.12(11) <sup>d</sup> |
| F(1)–B–F(2)   | 108.2(3)   | 108.0(4)   | 109.58(19)              |
| F(1)–B–N(3)   | 110.7(3)   | 110.7(4)   | 110.69(16)              |
| F(2)–B–N(3)   | 110.0(3)   | 111.3(4)   | 110.01(15)              |
| F(1)–B–N(4)   | 110.6(3)   | 109.4(4)   | 110.71(16)              |
| F(2)–B–N(4)   | 110.5(3)   | 110.7(4)   | 110.13(16)              |
| N(3)–B–N(4)   | 106.8(3)   | 106.8(4)   | 105.67(15)              |

<sup>a</sup> O(2)–C(11), <sup>b</sup> O(3)–C(21), <sup>c</sup> Al–O(2)–C(11), <sup>d</sup> Al–O(3)–C(21).

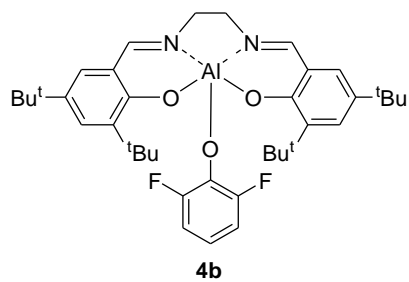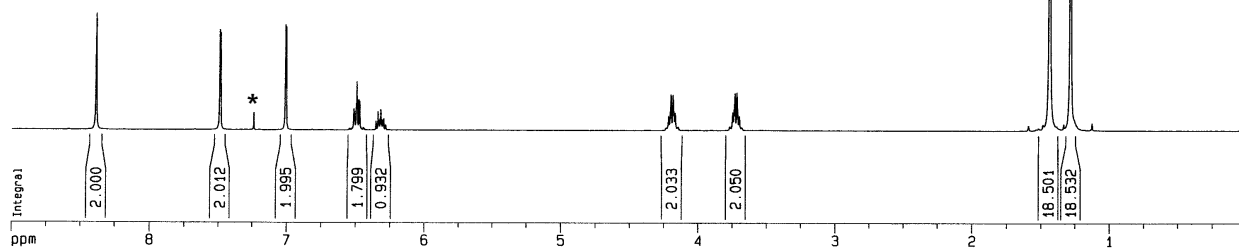

**Figure S1.**  $^1\text{H}$  NMR spectra of **4b** (\* from residual  $\text{CHCl}_3$  in  $\text{CDCl}_3$ ).

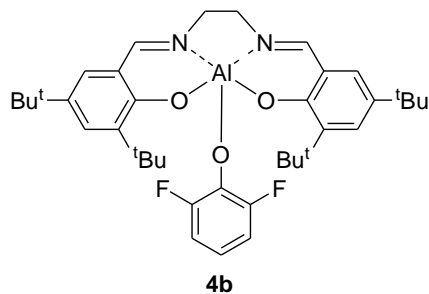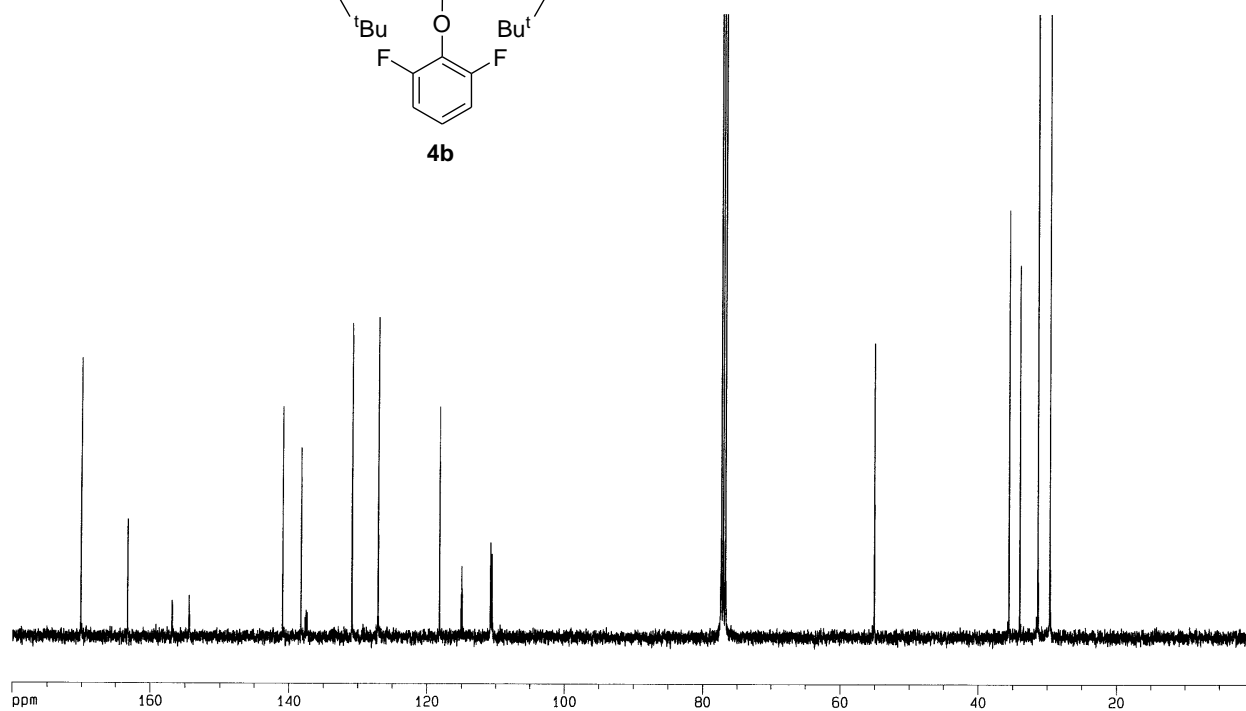

**Figure S2.**  $^{13}\text{C}$  NMR spectra of **4b** in  $\text{CDCl}_3$ .

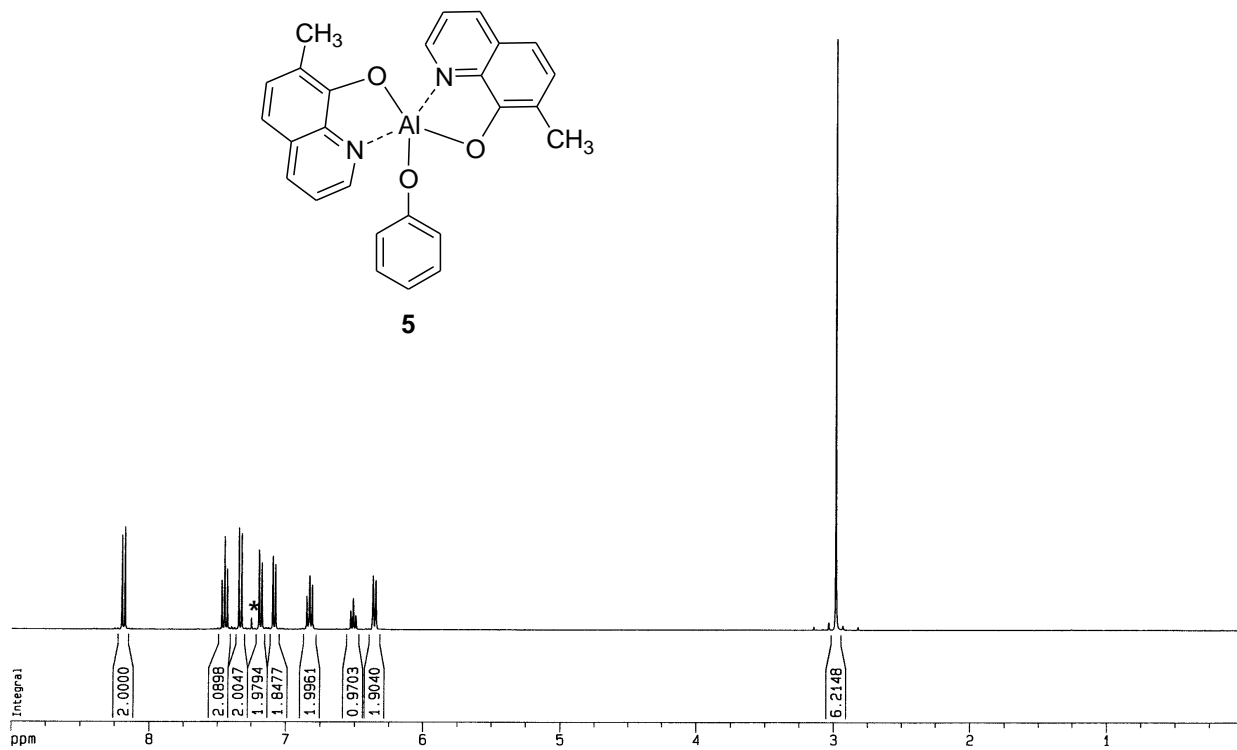

**Figure S3.** <sup>1</sup>H NMR spectra of **5** (\* from residual CHCl<sub>3</sub> in CDCl<sub>3</sub>).

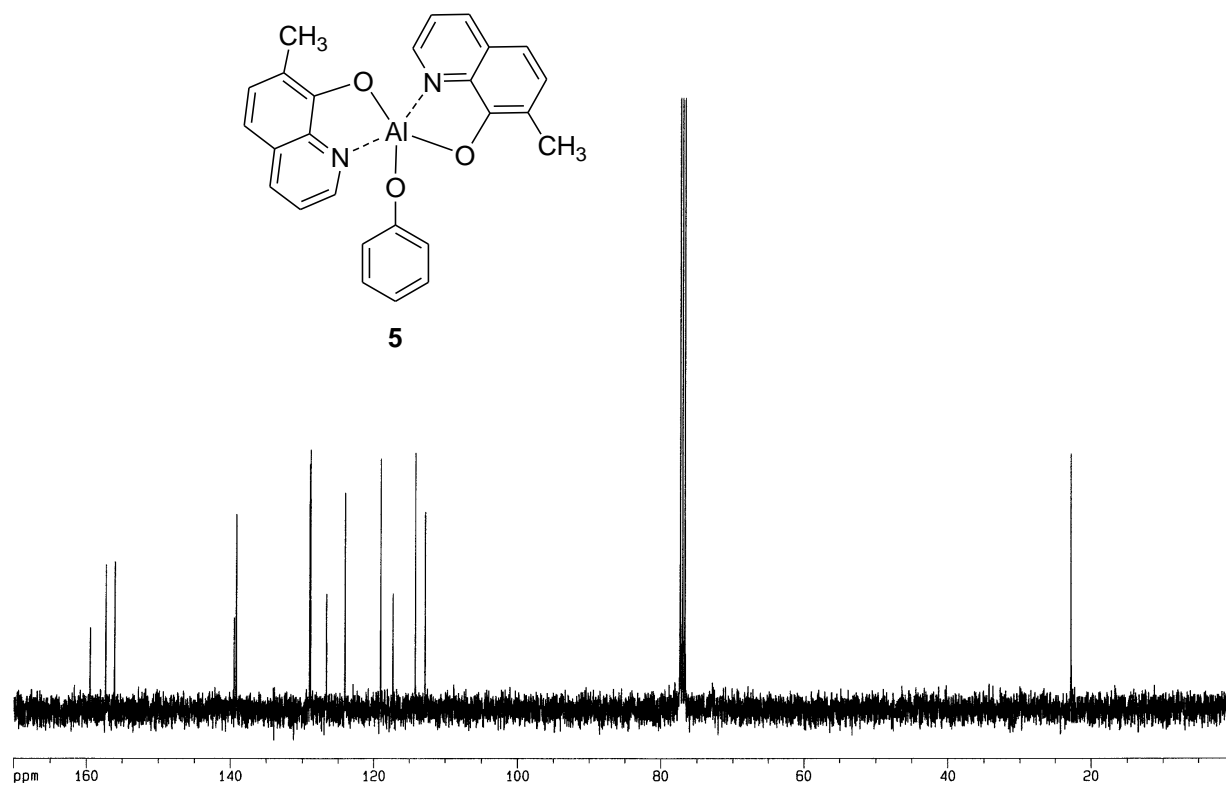

**Figure S4.** <sup>13</sup>C NMR spectra of **5** in CDCl<sub>3</sub>.

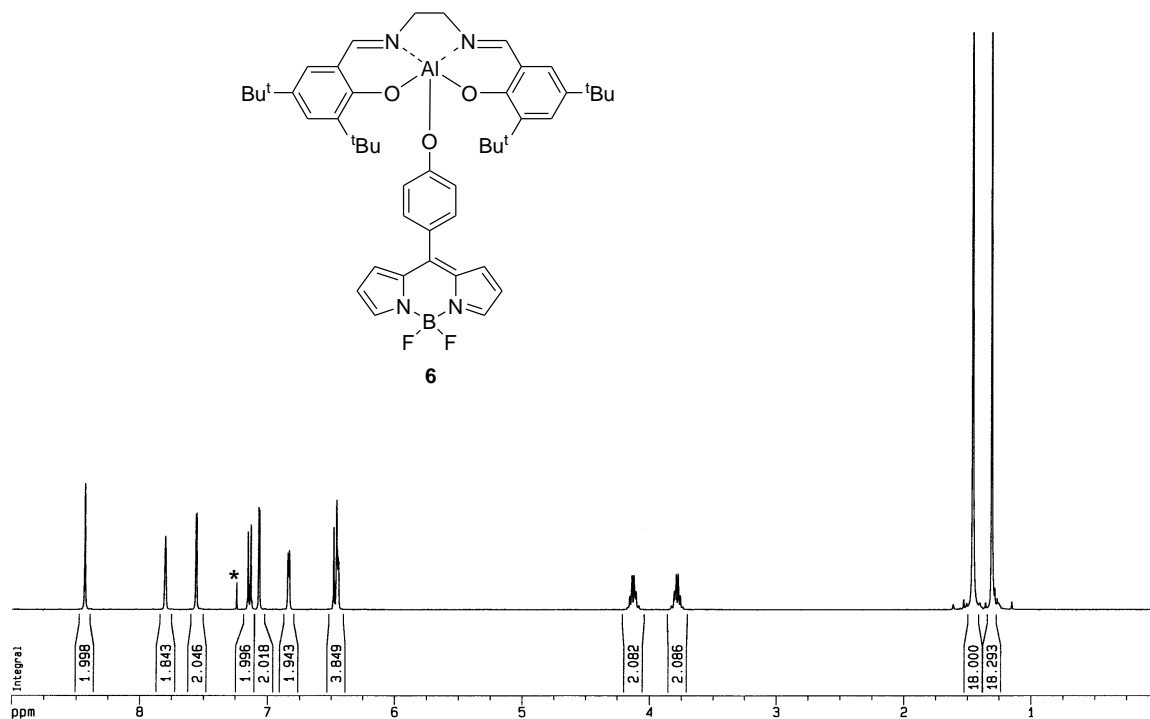

**Figure S5.**  $^1\text{H}$  NMR spectra of **6** (\* from residual  $\text{CHCl}_3$  in  $\text{CDCl}_3$ ).

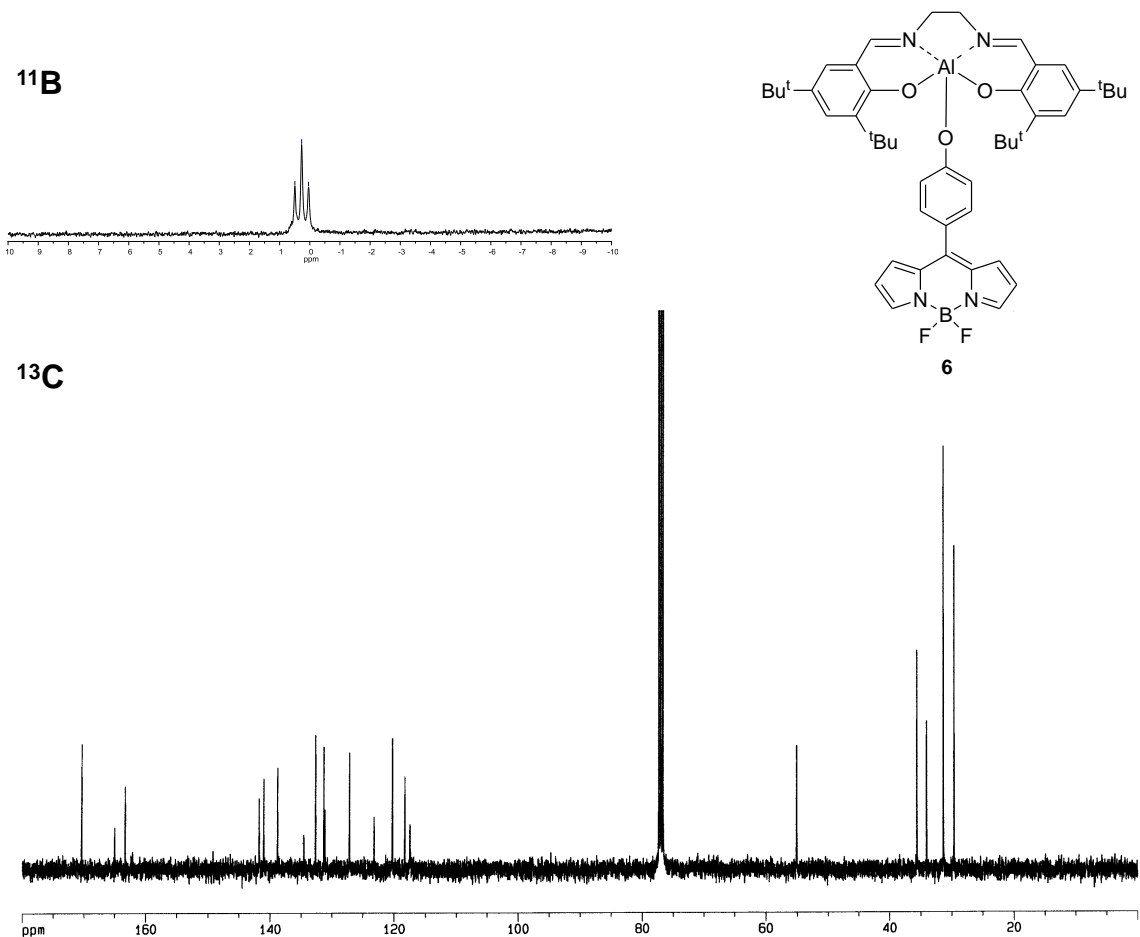

**Figure S6.**  $^{11}\text{B}$  (top) and  $^{13}\text{C}$  (bottom) NMR spectra of **6** in  $\text{CDCl}_3$ .

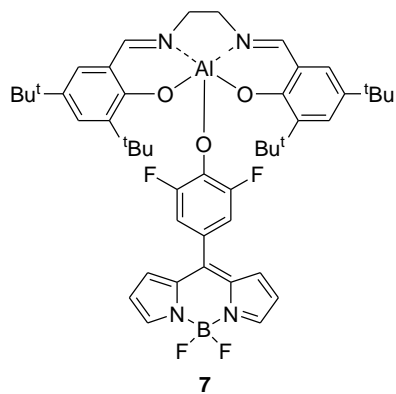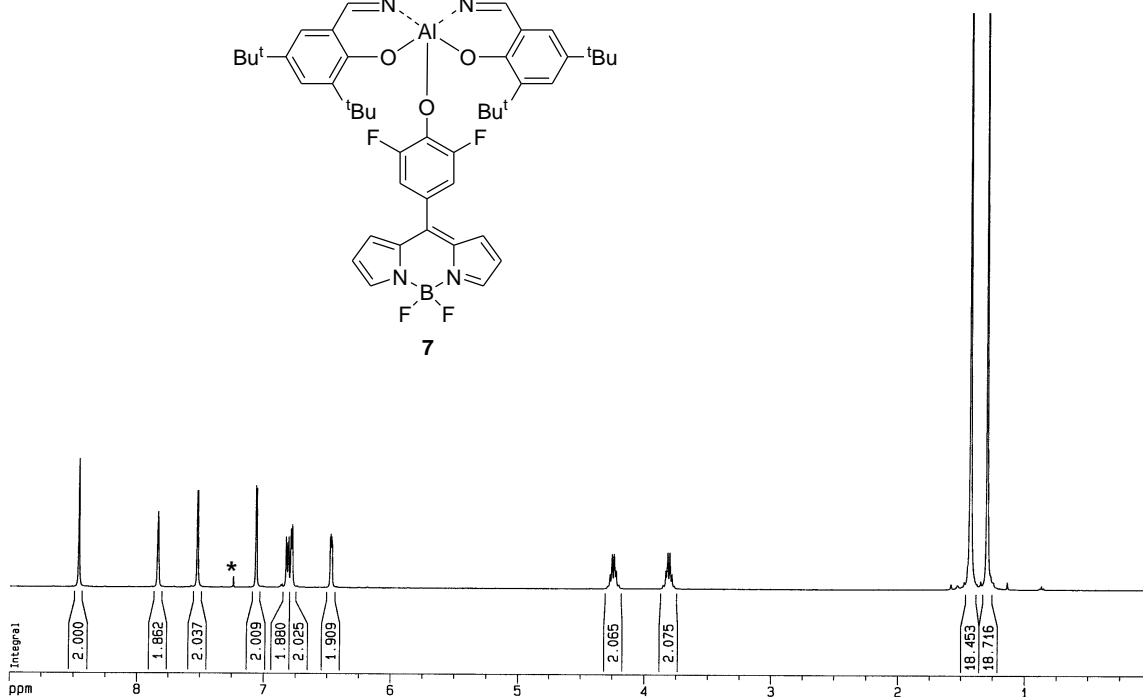

**Figure S7.**  $^1\text{H}$  NMR spectra of **7** (\* from residual  $\text{CHCl}_3$  in  $\text{CDCl}_3$ ).

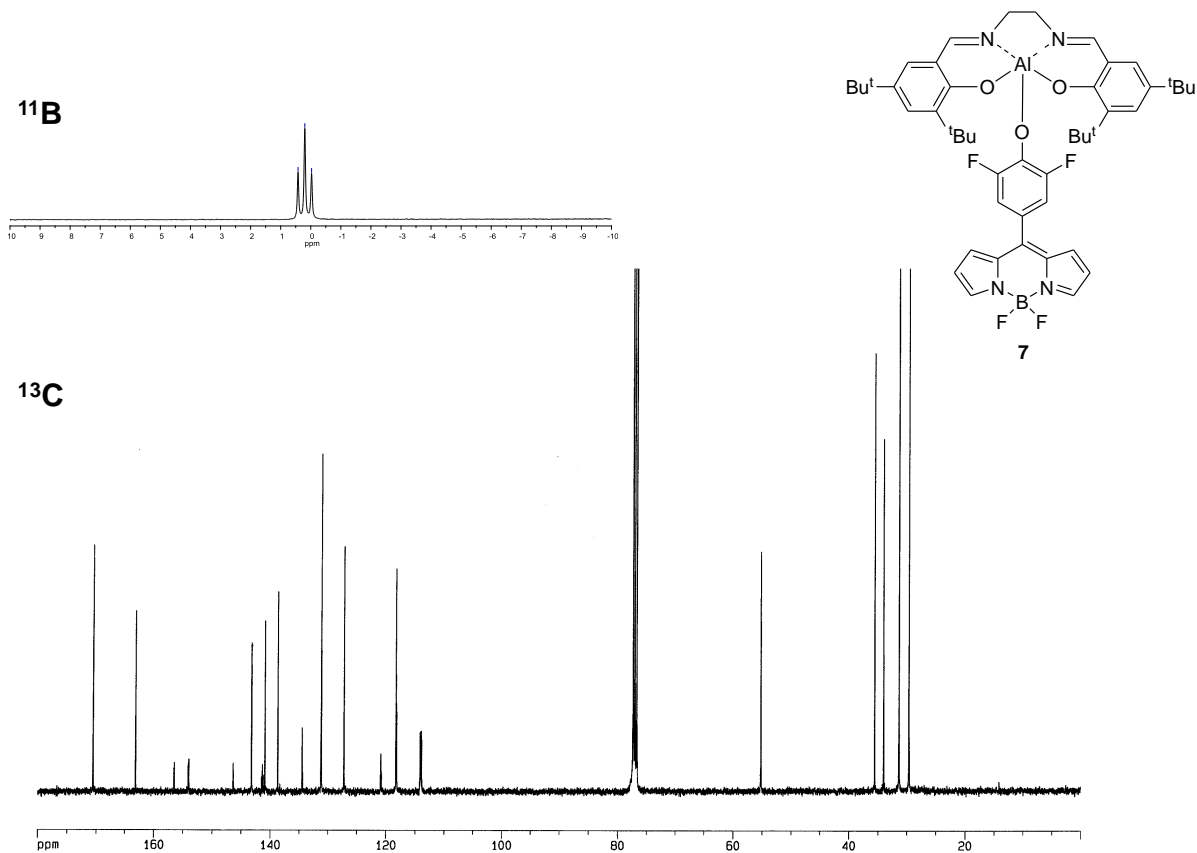

**Figure S8.**  $^{11}\text{B}$  (top) and  $^{13}\text{C}$  (bottom) NMR spectra of **7** in  $\text{CDCl}_3$ .

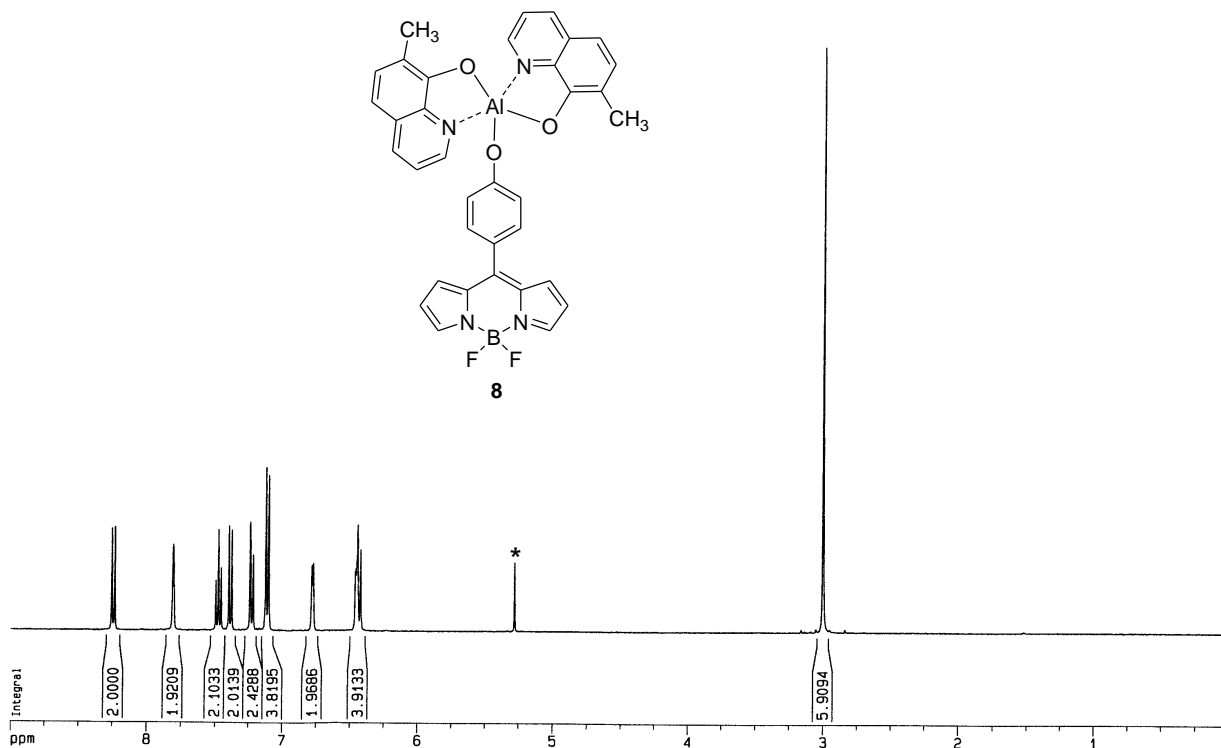

**Figure S9.**  $^1\text{H}$  NMR spectra of **8** (\* from residual  $\text{CHCl}_3$  in  $\text{CDCl}_3$ ).

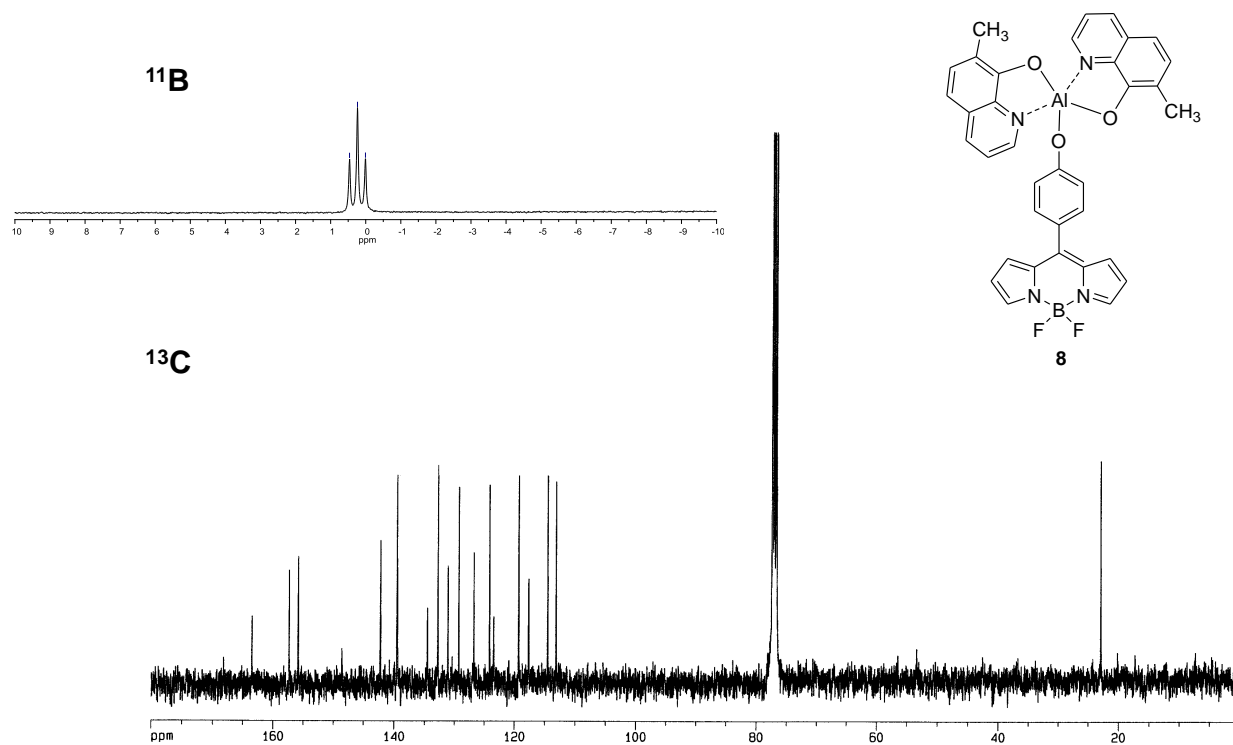

**Figure S10.**  $^{11}\text{B}$  (top) and  $^{13}\text{C}$  (bottom) NMR spectra of **8** in  $\text{CDCl}_3$ .



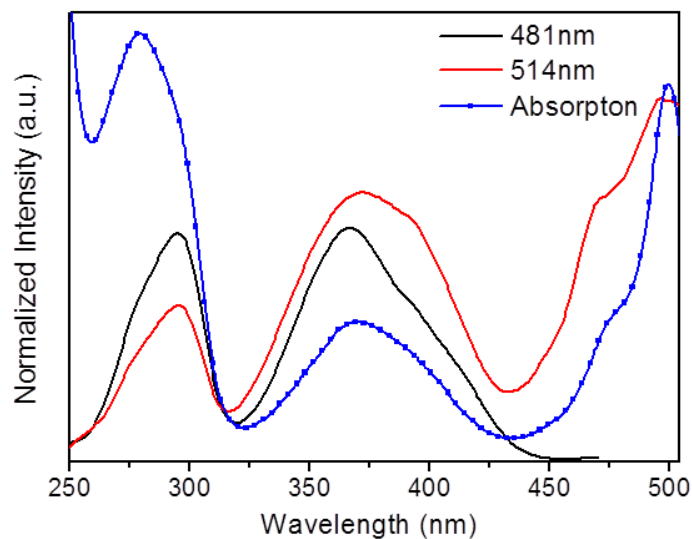

**Figure S11.** Comparison of absorption ( $5.0 \times 10^{-5}$  M) and excitation ( $5.0 \times 10^{-5}$  M) spectra for emission of 481 nm and 514 nm for **6** in  $\text{CHCl}_3$  at room temperature.

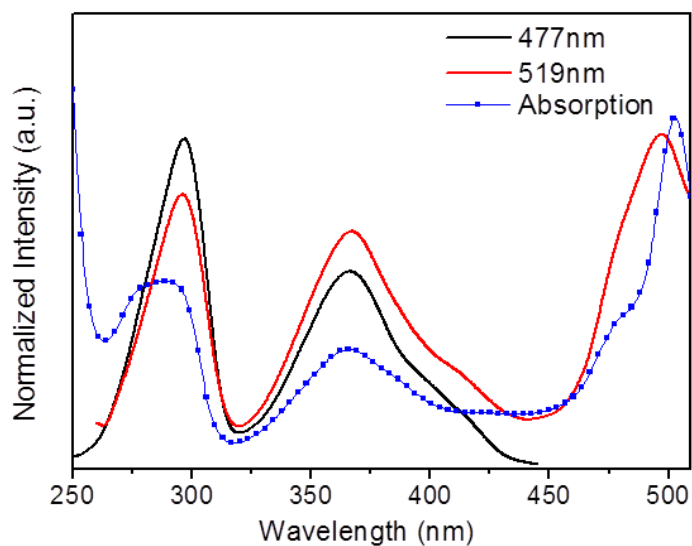

**Figure S12.** Comparison of absorption ( $5.0 \times 10^{-5}$  M) and excitation ( $5.0 \times 10^{-5}$  M) spectra for emission of 477 nm and 519 nm for **7** in  $\text{CHCl}_3$  at room temperature.

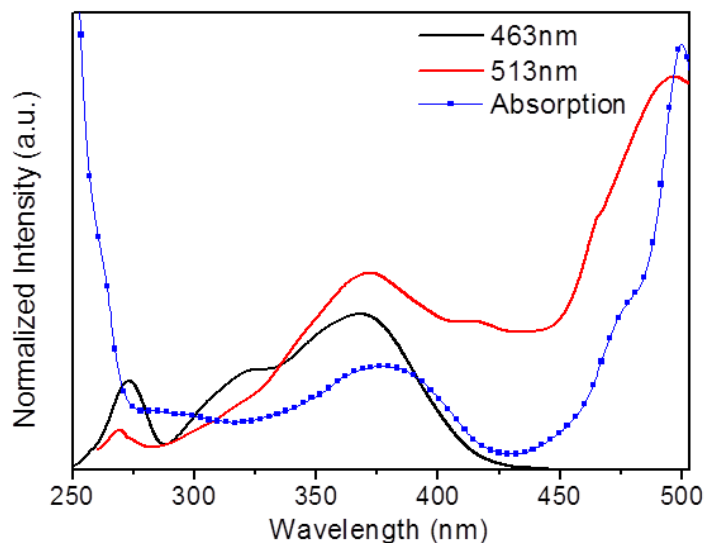

**Figure S13.** Comparison of absorption ( $5.0 \times 10^{-5}$  M) and excitation ( $5.0 \times 10^{-5}$  M) spectra for emission of 463 nm and 513 nm for **8** in  $\text{CHCl}_3$  at room temperature.

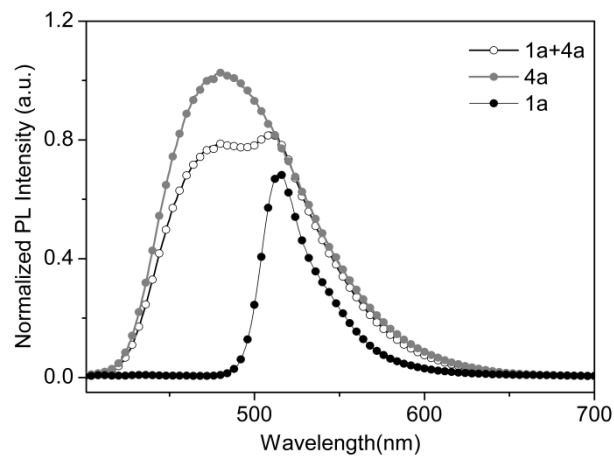

**Figure S14.** Emission spectra of **1a** (black circle), **4a**, (gray circle) and an equimolar mixture of **1a** and **4a** (open circle) ( $\lambda_{\text{ex}} = 370\text{nm}$ ,  $5.0 \times 10^{-5}$  M,  $\text{CHCl}_3$ ).

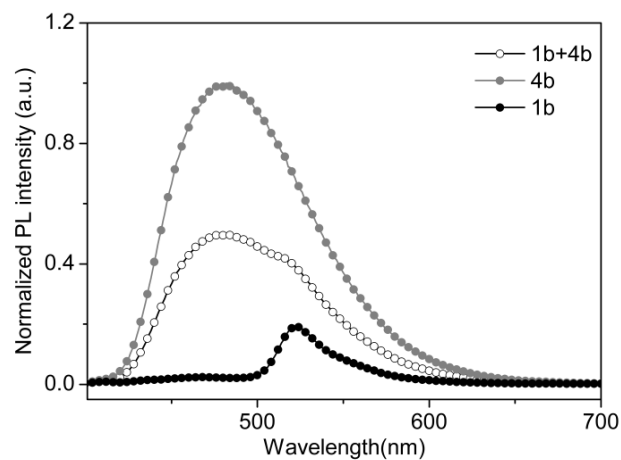

**Figure S15.** Emission spectra of **1b** (black circle), **4b**, (gray circle) and an equimolar mixture of **1b** and **4b** (open circle) ( $\lambda_{\text{ex}} = 370\text{nm}$ ,  $5.0 \times 10^{-5}$  M,  $\text{CHCl}_3$ ).

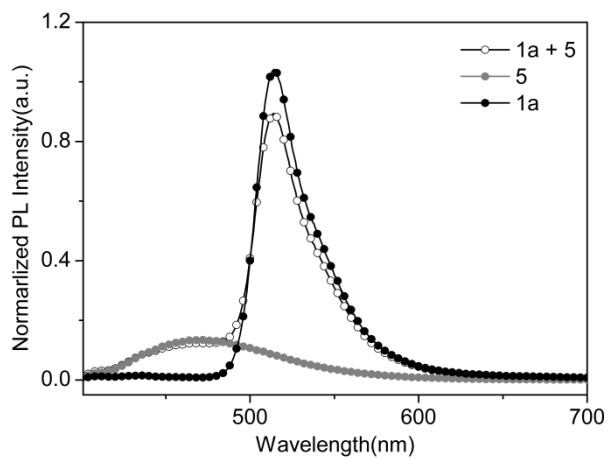

**Figure S16.** Emission spectra of **1a** (black circle), **5**, (gray circle) and an equimolar mixture of **1a** and **5** (open circle) ( $\lambda_{\text{ex}} = 370\text{nm}$ ,  $5.0 \times 10^{-5}\text{ M}$ ,  $\text{CHCl}_3$ ).

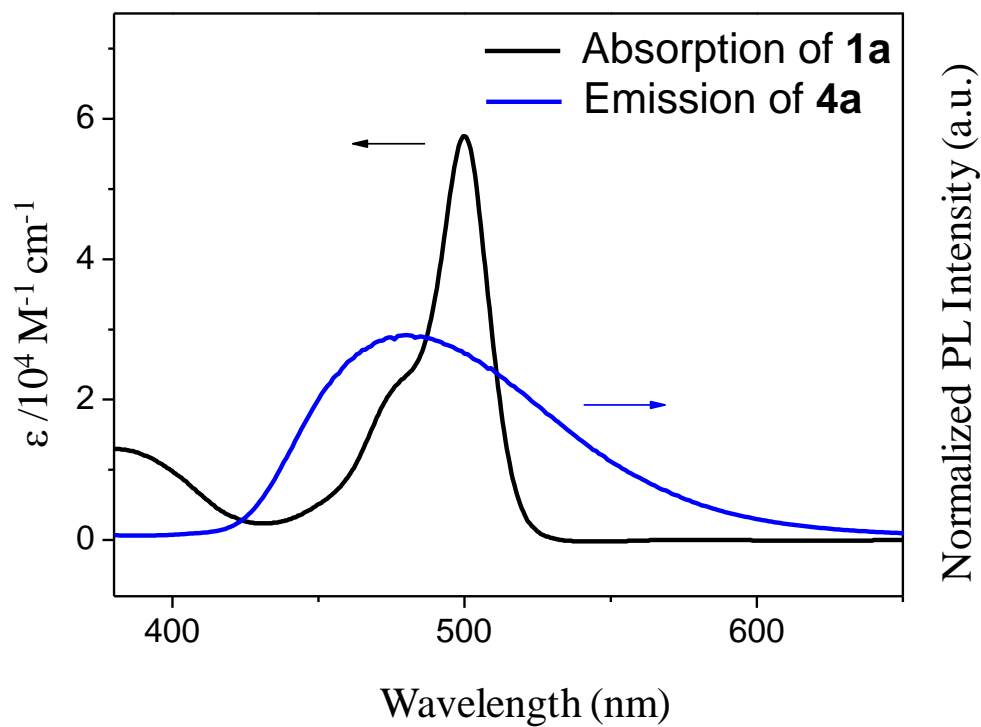

**Figure S17.** Comparison of absorption spectra of **1a** and emission spectra of **4a** ( $5.0 \times 10^{-5}\text{ M}$ ,  $\text{CHCl}_3$ ).

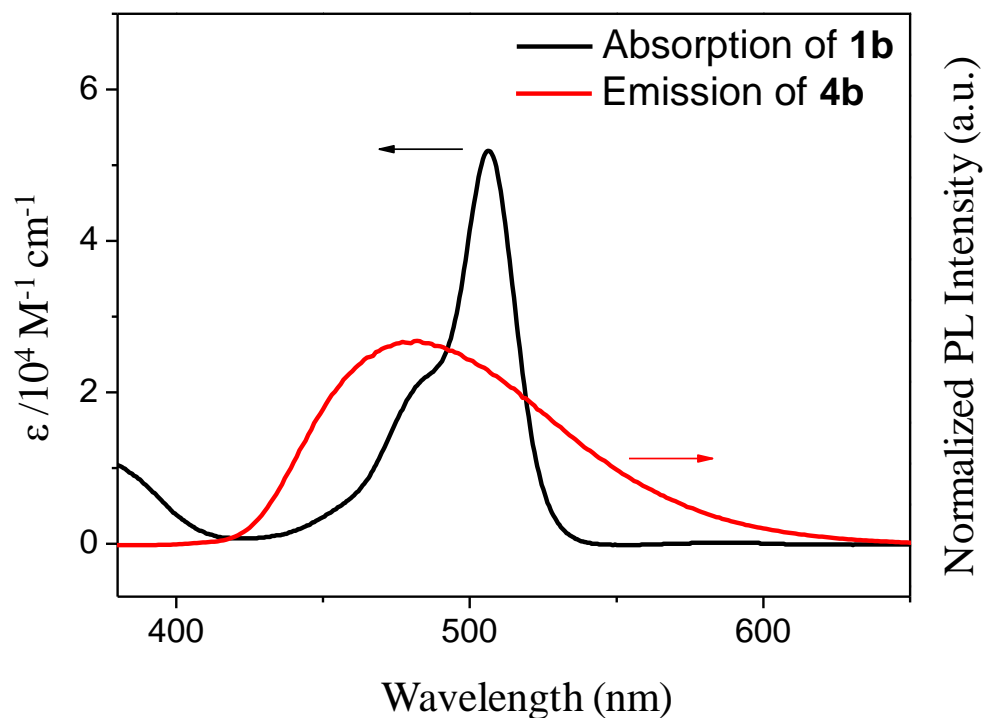

**Figure S18.** Comparison of absorption spectra of **1b** and emission spectra of **4b** ( $5.0 \times 10^{-5} \text{ M}$ ,  $\text{CHCl}_3$ ).

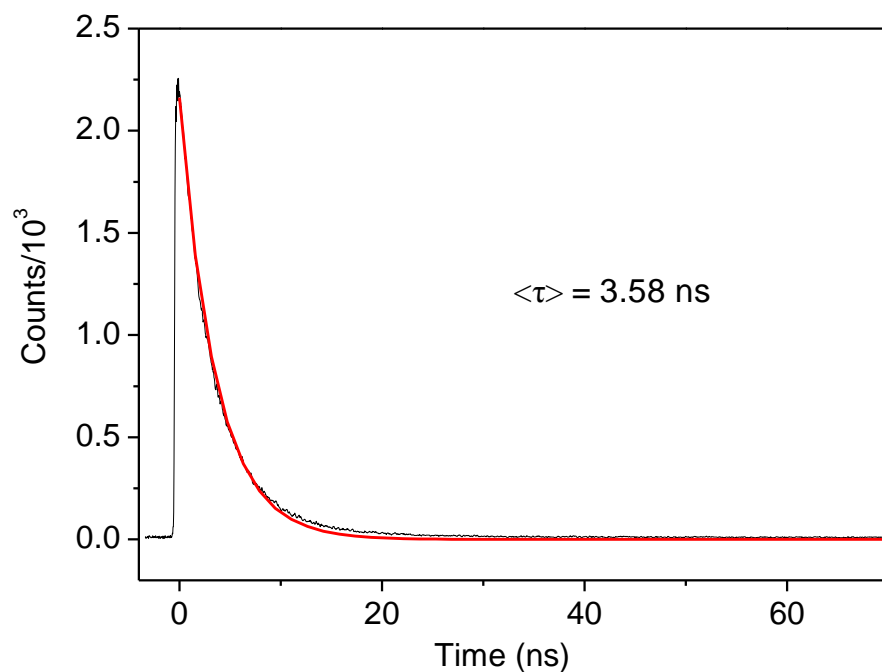

**Figure S19.** An Emission decay curve detected at 470 nm in  $\text{CHCl}_3$  ( $5.0 \times 10^{-5} \text{ M}$ ) solution of **6** at 298 K (black line). The red-line corresponds to the single-exponential fitting curve ( $R^2 = 0.9965$ ) for the experimental curve.

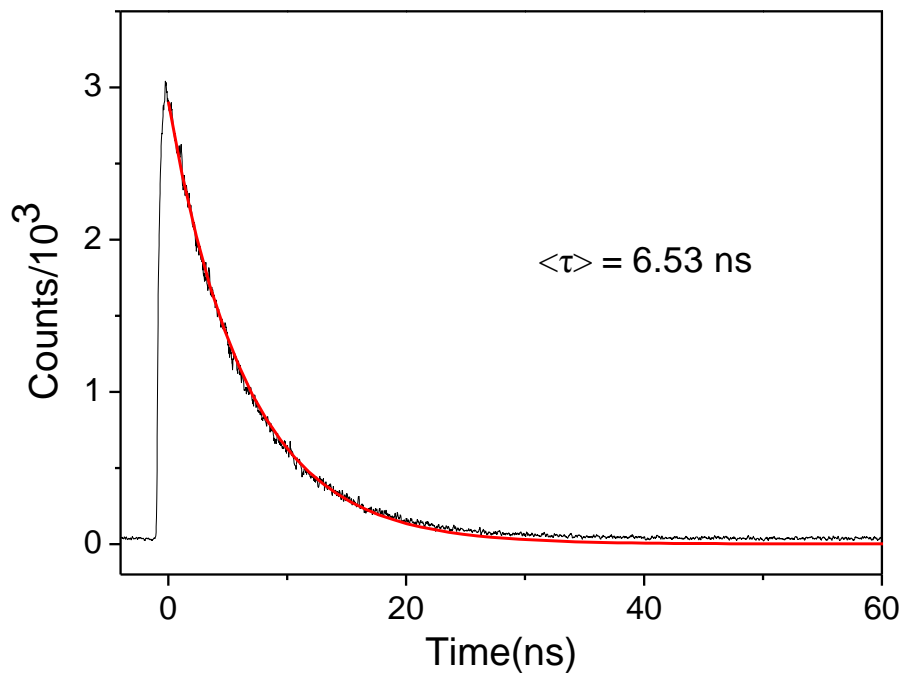

**Figure S20.** An Emission decay curve detected at 520 nm in  $\text{CHCl}_3$  ( $5.0 \times 10^{-5}$  M) solution of **6** at 298 K (black line). The red-line corresponds to the single-exponential fitting curve ( $R^2 = 0.9966$ ) for the experimental curve.

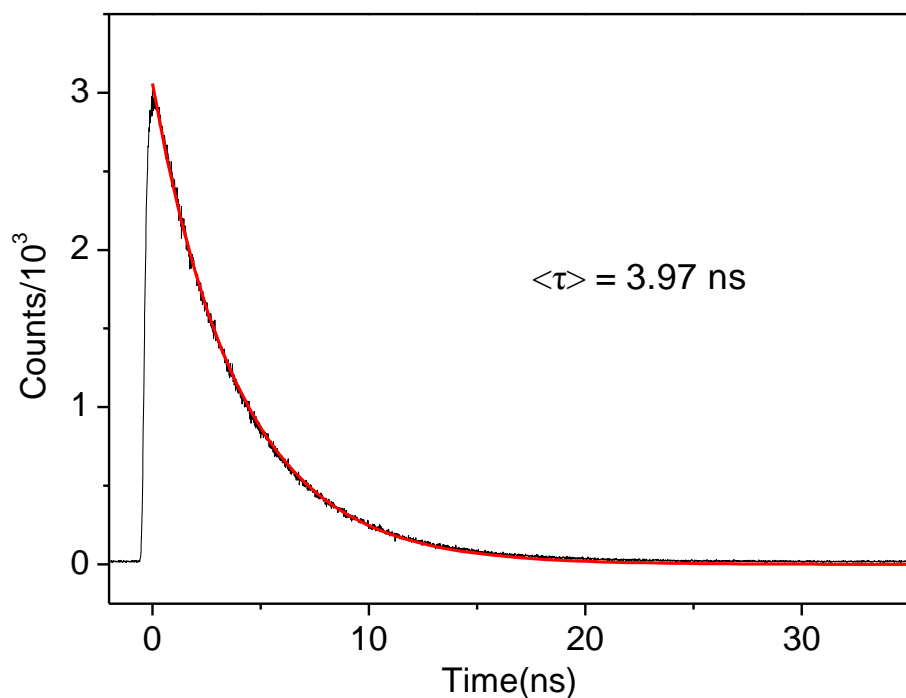

**Figure S21.** An Emission decay curve detected at 470 nm in  $\text{CHCl}_3$  ( $5.0 \times 10^{-5}$  M) solution of **7** at 298 K (black line). The red-line corresponds to the single-exponential fitting curve ( $R^2 = 0.9989$ ) for the experimental curve.

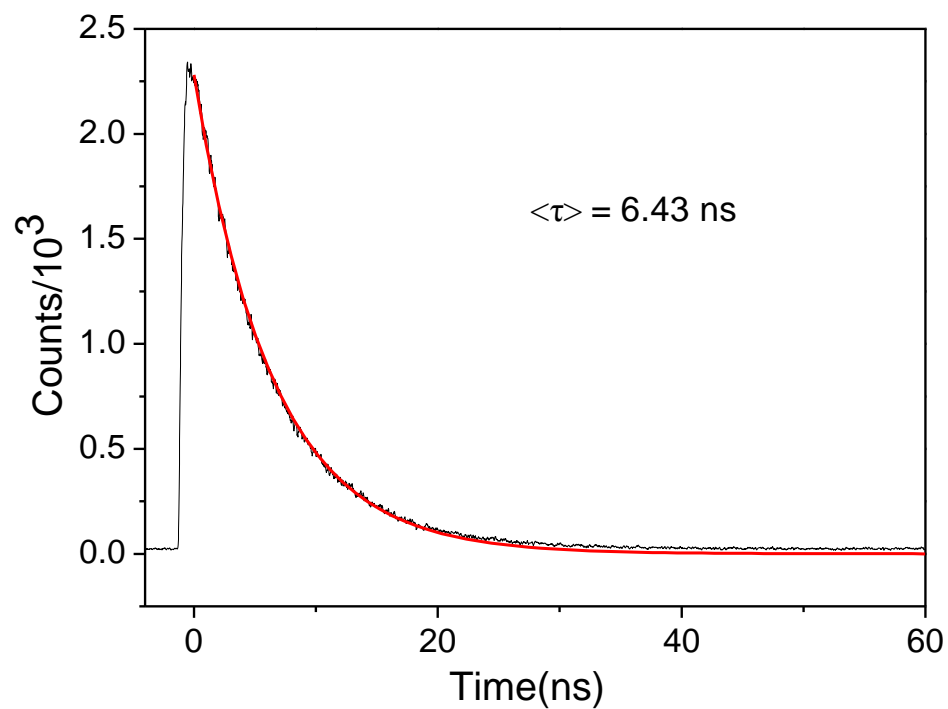

**Figure S22.** An Emission decay curve detected at 520 nm in  $\text{CHCl}_3$  ( $5.0 \times 10^{-5}$  M) solution of **7** at 298 K (black line). The red-line corresponds to the single-exponential fitting curve ( $R^2 = 0.9977$ ) for the experimental curve.

## DFT Computational Results

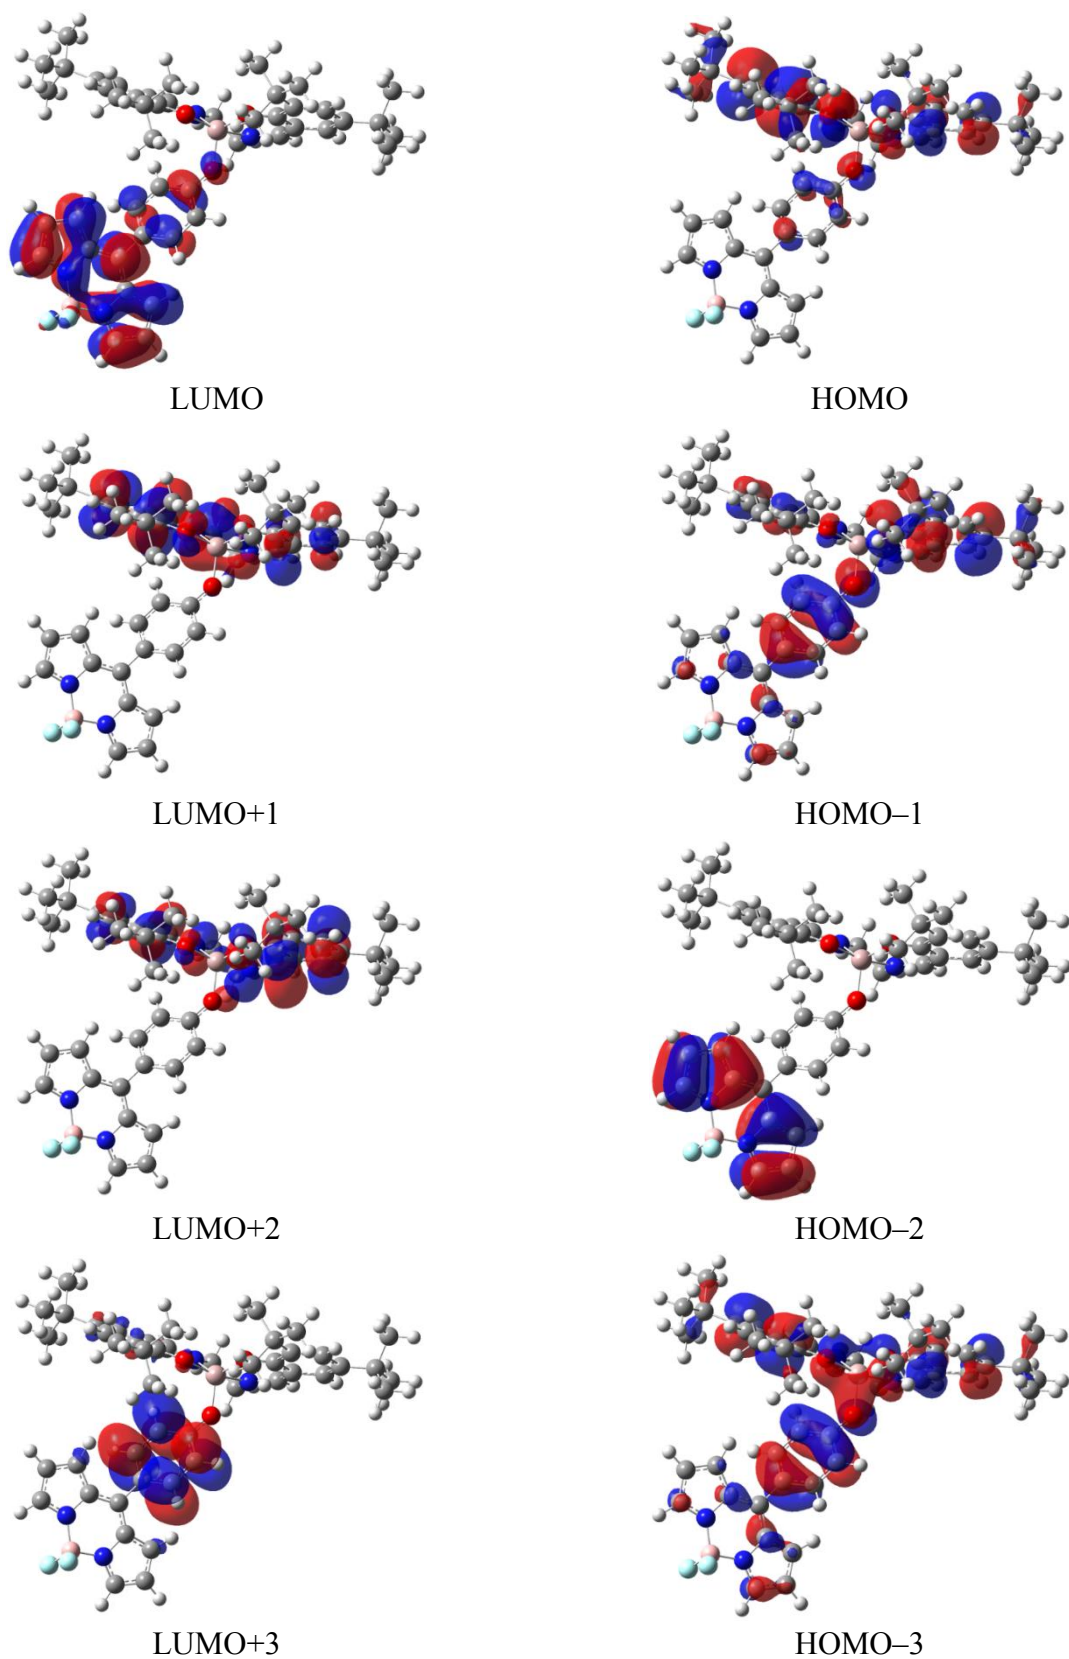

**Figure S23.** The selected frontier orbitals of **6** from B3LYP/6-31G(d) calculations (Isovalue = 0.04) with CPCM in CHCl<sub>3</sub> at their lowest singlet ground state (S<sub>0</sub>) optimized geometries.

**Table S3** Molecular orbital distributions (in %) and energies (in eV) of **6** at the ground state ( $S_0$ ) optimized geometries.

| Orbitals | Salen-Al | Bridged phenoxy | Bodipy | Energy level |
|----------|----------|-----------------|--------|--------------|
| LUMO+4   | 85.03    | 13.00           | 1.97   | 0.13         |
| LUMO+3   | 3.20     | 94.45           | 2.35   | -0.13        |
| LUMO+2   | 99.69    | 0.23            | 0.08   | -1.58        |
| LUMO+1   | 99.19    | 0.62            | 0.20   | -1.95        |
| LUMO     | 0.49     | 11.24           | 88.28  | -2.65        |
| HOMO     | 93.20    | 6.05            | 0.75   | -5.65        |
| HOMO-1   | 56.01    | 38.17           | 5.82   | -5.77        |
| HOMO-2   | 0.05     | 0.65            | 99.30  | -5.81        |
| HOMO-3   | 51.78    | 41.36           | 6.87   | -5.91        |
| HOMO-4   | 99.61    | 0.34            | 0.04   | -6.68        |

**Table S4** Computed absorption wavelengths ( $\lambda_{\text{calc}}$  in nm) and oscillator strengths ( $f_{\text{calc.}}$ ) for **6** from TD-B3LYP/6-31G(d) calculations with CPCM in  $\text{CHCl}_3$  at their lowest singlet ground state ( $S_0$ ) optimized geometries.

| state | $\lambda_{\text{calc}}$ (nm) | $f_{\text{calc.}}$ | contribution                                                                                                 |
|-------|------------------------------|--------------------|--------------------------------------------------------------------------------------------------------------|
| S1    | 472.90                       | 0.1366             | HOMO-1 $\rightarrow$ LUMO (17.7%)<br>HOMO $\rightarrow$ LUMO (80.7%)                                         |
| S2    | 456.22                       | 0.2169             | HOMO-3 $\rightarrow$ LUMO (22.9%)<br>HOMO-1 $\rightarrow$ LUMO (58.7%)<br>HOMO $\rightarrow$ LUMO (17.9%)    |
| S3    | 428.25                       | 0.0321             | HOMO-3 $\rightarrow$ LUMO (74.9%)<br>HOMO-1 $\rightarrow$ LUMO (23.3%)                                       |
| S4    | 416.05                       | 0.4279             | HOMO-6 $\rightarrow$ LUMO (5.0%)<br>HOMO-2 $\rightarrow$ LUMO (94.8%)                                        |
| S5    | 392.99                       | 0.0328             | HOMO $\rightarrow$ LUMO+1 (98.2%)                                                                            |
| S6    | 376.08                       | 0.0207             | HOMO-3 $\rightarrow$ LUMO+1 (2.8%)<br>HOMO-1 $\rightarrow$ LUMO+1 (96.2%)                                    |
| S7    | 360.37                       | 0.0551             | HOMO-3 $\rightarrow$ LUMO+1 (94.5%)<br>HOMO-1 $\rightarrow$ LUMO+1 (2.8%)                                    |
| S8    | 350.46                       | 0.0482             | HOMO-6 $\rightarrow$ LUMO (59.1%)<br>HOMO-2 $\rightarrow$ LUMO (3.1%)<br>HOMO-2 $\rightarrow$ LUMO+1 (34.7%) |
| S9    | 349.40                       | 0.0362             | HOMO-6 $\rightarrow$ LUMO (32.1%)<br>HOMO-2 $\rightarrow$ LUMO+1 (63.4%)                                     |
| S10   | 346.04                       | 0.0779             | HOMO $\rightarrow$ LUMO+2 (96.6%)                                                                            |



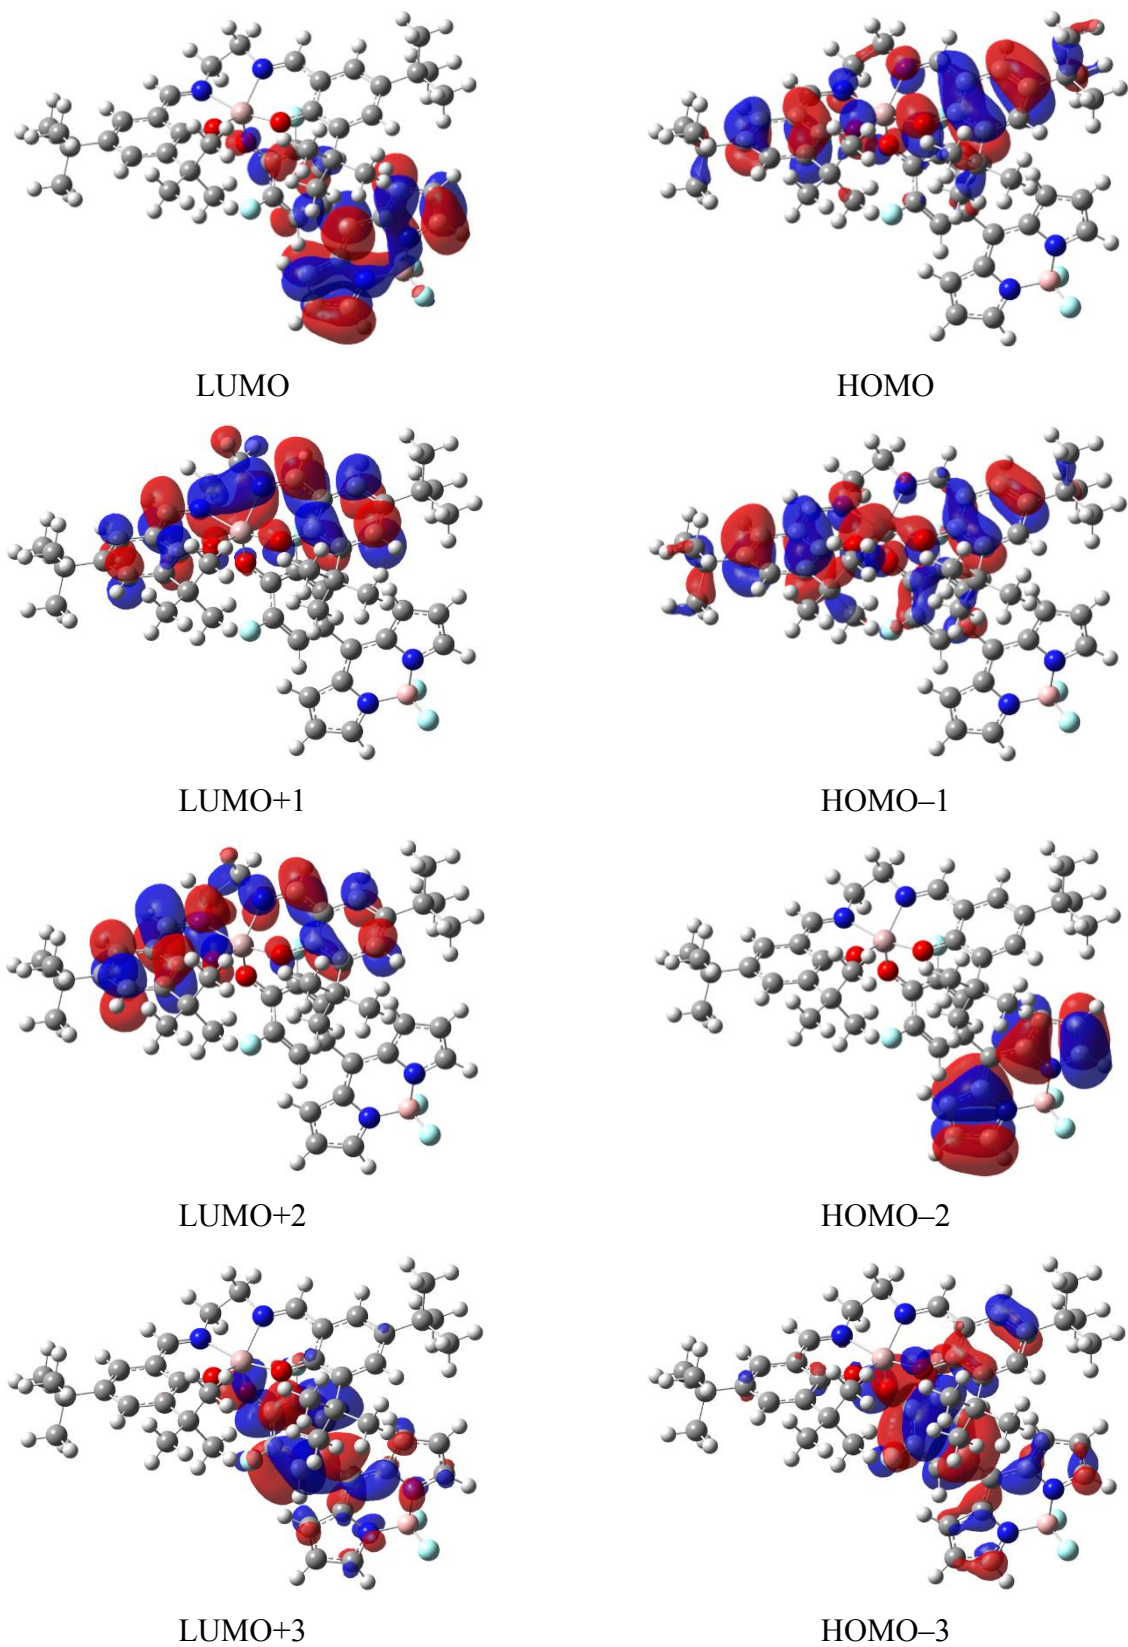

**Figure S24.** The selected frontier orbitals of **7** from B3LYP/6-31G(d) calculations (Isovalue = 0.04) with CPCM in CHCl<sub>3</sub> at their lowest singlet ground state (S<sub>0</sub>) optimized geometries.

**Table S5** Molecular orbital distributions (in %) and energies (in eV) of **7** at the ground state ( $S_0$ ) optimized geometries.

| Orbitals | Salen-Al | Bridged phenoxy | Bodipy | Energy level |
|----------|----------|-----------------|--------|--------------|
| LUMO+4   | 3.72     | 94.14           | 2.14   | -0.10        |
| LUMO+3   | 3.65     | 84.00           | 12.35  | -0.14        |
| LUMO+2   | 99.80    | 0.17            | 0.03   | -1.56        |
| LUMO+1   | 99.53    | 0.46            | 0.01   | -1.89        |
| LUMO     | 0.21     | 9.96            | 89.83  | -2.79        |
| HOMO     | 96.41    | 3.31            | 0.27   | -5.63        |
| HOMO-1   | 91.55    | 7.62            | 0.83   | -5.81        |
| HOMO-2   | 0.06     | 0.75            | 99.19  | -5.91        |
| HOMO-3   | 13.82    | 76.25           | 9.93   | -6.12        |
| HOMO-4   | 99.28    | 0.65            | 0.07   | -6.66        |

**Table S6** Computed absorption wavelengths ( $\lambda_{\text{calc}}$  in nm) and oscillator strengths ( $f_{\text{calc}}$ ) for **7** from TD-B3LYP/6-31G(d) calculations with CPCM in  $\text{CHCl}_3$  at their lowest singlet ground state ( $S_0$ ) optimized geometries.

| state | $\lambda_{\text{calc}}$ (nm) | $f_{\text{calc}}$ | contribution                                                                                                                                    |
|-------|------------------------------|-------------------|-------------------------------------------------------------------------------------------------------------------------------------------------|
| S1    | 504.92                       | 0.0219            | HOMO-1 $\rightarrow$ LUMO (5.2%)<br>HOMO $\rightarrow$ LUMO (94.6%)                                                                             |
| S2    | 461.46                       | 0.0649            | HOMO-3 $\rightarrow$ LUMO (5.1%)<br>HOMO-1 $\rightarrow$ LUMO (89.4%)<br>HOMO $\rightarrow$ LUMO (5.3%)                                         |
| S3    | 435.08                       | 0.2098            | HOMO-3 $\rightarrow$ LUMO (94.2%)<br>HOMO-1 $\rightarrow$ LUMO (5.2%)                                                                           |
| S4    | 419.91                       | 0.4338            | HOMO-7 $\rightarrow$ LUMO (5.5%)<br>HOMO-2 $\rightarrow$ LUMO (94.7%)                                                                           |
| S5    | 388.53                       | 0.0216            | HOMO $\rightarrow$ LUMO+1 (98.1%)                                                                                                               |
| S6    | 368.22                       | 0.0072            | HOMO-6 $\rightarrow$ LUMO (94.0%)<br>HOMO-5 $\rightarrow$ LUMO (3.6%)                                                                           |
| S7    | 363.09                       | 0.069             | HOMO-1 $\rightarrow$ LUMO+1 (97.1%)                                                                                                             |
| S8    | 350.95                       | 0.0239            | HOMO-7 $\rightarrow$ LUMO (17.7%)<br>HOMO-6 $\rightarrow$ LUMO (2.9%)<br>HOMO-5 $\rightarrow$ LUMO (16.3%)<br>HOMO-4 $\rightarrow$ LUMO (61.6%) |
| S9    | 349.63                       | 0.0848            | HOMO-7 $\rightarrow$ LUMO (75.5%)<br>HOMO-5 $\rightarrow$ LUMO (2.1%)<br>HOMO-4 $\rightarrow$ LUMO (17.5%)<br>HOMO-2 $\rightarrow$ LUMO (4.5%)  |

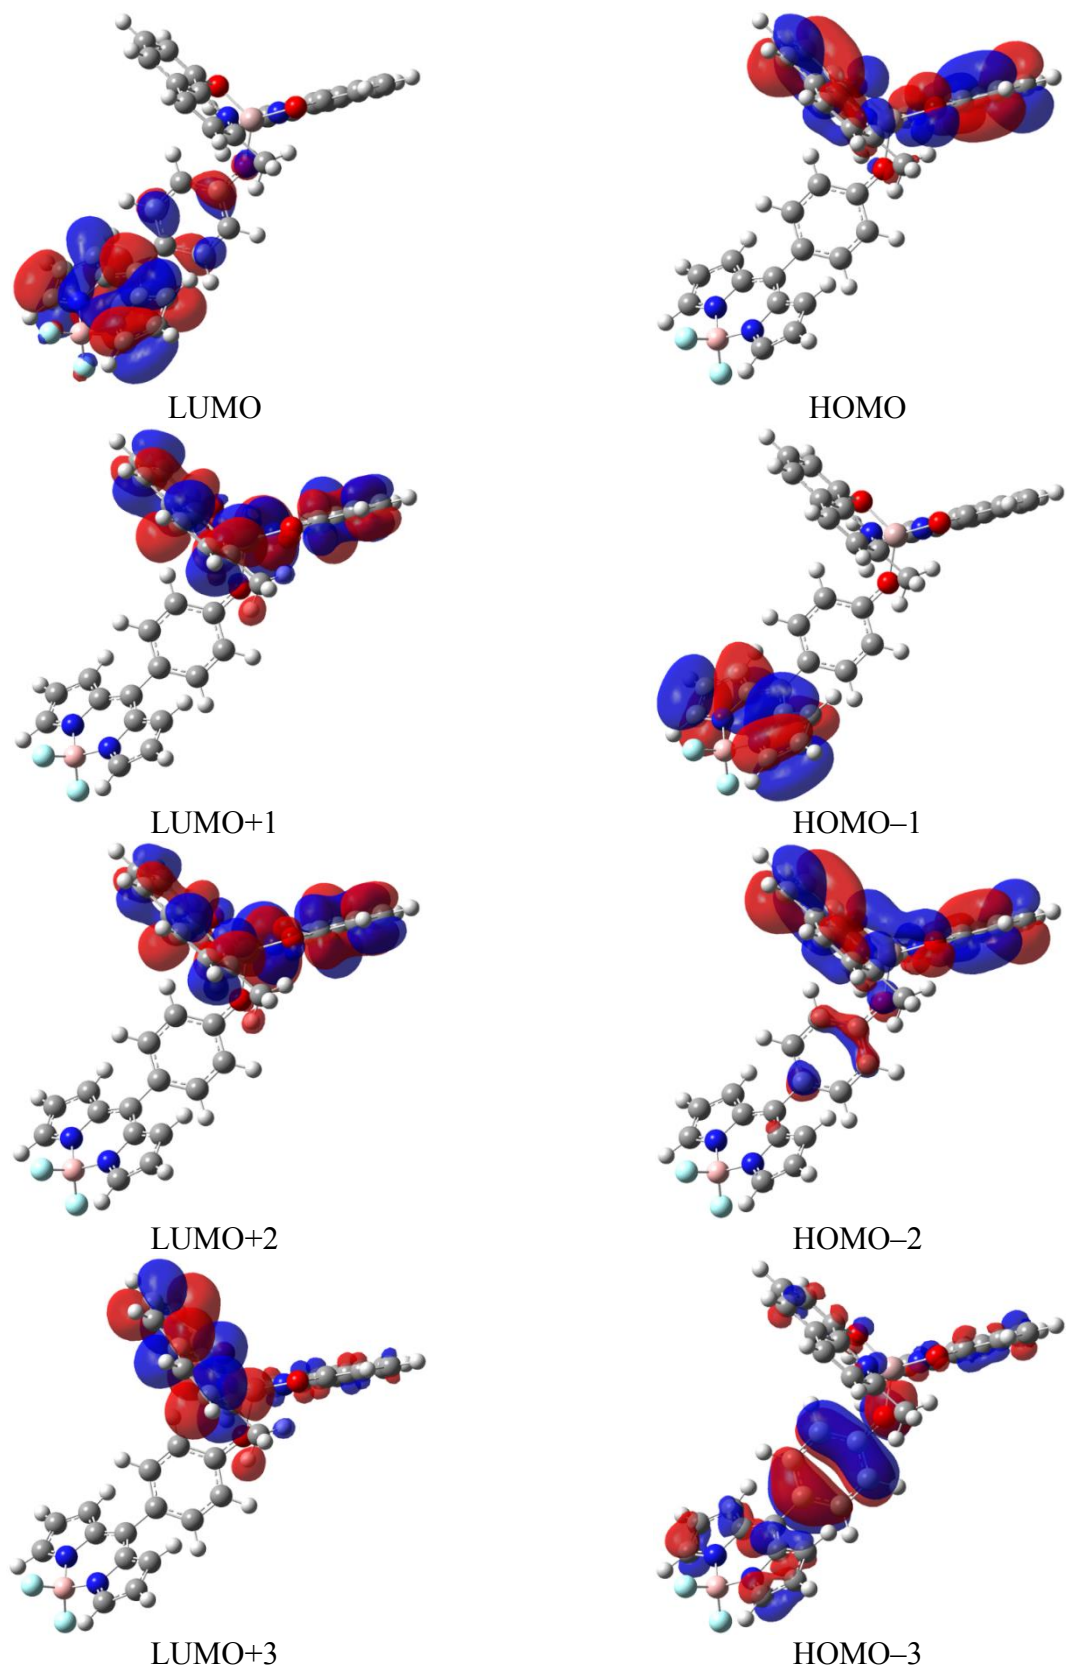

**Figure S25.** The selected frontier orbitals of **8** from B3LYP/6-31G(d) calculations (Isovalue = 0.04) with CPCM in  $\text{CHCl}_3$  at their lowest singlet ground state ( $S_0$ ) optimized geometries.

**Table S7** Molecular orbital distributions (in %) and energies (in eV) of **8** at the ground state ( $S_0$ ) optimized geometries.

| Orbitals | Salen-Al | Bridged phenoxy | Bodipy | Energy level |
|----------|----------|-----------------|--------|--------------|
| LUMO+4   | 99.81    | 0.17            | 0.01   | -0.65        |
| LUMO+3   | 99.60    | 0.38            | 0.02   | -0.69        |
| LUMO+2   | 99.75    | 0.24            | 0.00   | -1.84        |
| LUMO+1   | 99.86    | 0.13            | 0.01   | -1.91        |
| LUMO     | 0.17     | 10.75           | 89.08  | -2.70        |
| HOMO     | 99.34    | 0.62            | 0.04   | -5.72        |
| HOMO-1   | 0.18     | 0.60            | 99.22  | -5.86        |
| HOMO-2   | 92.18    | 6.70            | 1.11   | -5.90        |
| HOMO-3   | 9.80     | 78.09           | 12.11  | -5.96        |
| HOMO-4   | 0.15     | 5.84            | 94.01  | -6.88        |

**Table S8** Computed absorption wavelengths ( $\lambda_{\text{calc}}$  in nm) and oscillator strengths ( $f_{\text{calc.}}$ ) for **8** from TD-B3LYP/6-31G(d) calculations with CPCM in  $\text{CHCl}_3$  at their lowest singlet ground state ( $S_0$ ) optimized geometries.

| state | $\lambda_{\text{calc}}$ (nm) | $f_{\text{calc.}}$ | contribution                                                                                                                                                                             |
|-------|------------------------------|--------------------|------------------------------------------------------------------------------------------------------------------------------------------------------------------------------------------|
| S1    | 458.93                       | 0.0063             | HOMO-2 $\rightarrow$ LUMO (2.3%)<br>HOMO $\rightarrow$ LUMO (95.9%)                                                                                                                      |
| S2    | 448.99                       | 0.3555             | HOMO-3 $\rightarrow$ LUMO (81.0%)<br>HOMO-2 $\rightarrow$ LUMO (17.9%)                                                                                                                   |
| S3    | 429.26                       | 0.0064             | HOMO-3 $\rightarrow$ LUMO (16.5%)<br>HOMO-2 $\rightarrow$ LUMO (79.4%)<br>HOMO $\rightarrow$ LUMO (3.8%)                                                                                 |
| S4    | 416.26                       | 0.4319             | HOMO-4 $\rightarrow$ LUMO (5.4%)<br>HOMO-1 $\rightarrow$ LUMO (94.7%)                                                                                                                    |
| S5    | 384.33                       | 0.1114             | HOMO-2 $\rightarrow$ LUMO+2 (6.9%)<br>HOMO $\rightarrow$ LUMO+1 (89.0%)<br>HOMO $\rightarrow$ LUMO+2 (2.1%)                                                                              |
| S6    | 375.07                       | 0.0025             | HOMO-2 $\rightarrow$ LUMO+1 (14.9%)<br>HOMO $\rightarrow$ LUMO+2 (80.7%)                                                                                                                 |
| S7    | 359.38                       | 0.0042             | HOMO-3 $\rightarrow$ LUMO+1 (2.2%)<br>HOMO-2 $\rightarrow$ LUMO+1 (76.7%)<br>HOMO-2 $\rightarrow$ LUMO+2 (5.0%)<br>HOMO $\rightarrow$ LUMO+1 (2.2%)<br>HOMO $\rightarrow$ LUMO+2 (15.6%) |
| S8    | 354.15                       | 0.0011             | HOMO-3 $\rightarrow$ LUMO+1 (72.2%)<br>HOMO-3 $\rightarrow$ LUMO+2 (9.1%)                                                                                                                |

|     |        |        |                         |
|-----|--------|--------|-------------------------|
|     |        |        | HOMO-2 → LUMO+1 (3.9%)  |
|     |        |        | HOMO-2 → LUMO+2 (11.5%) |
|     |        |        | HOMO → LUMO+2 (2.7%)    |
| S9  | 352.92 | 0.0036 | HOMO-3 → LUMO+1 (11.1%) |
|     |        |        | HOMO-3 → LUMO+2 (4.2%)  |
|     |        |        | HOMO-2 → LUMO+1 (2.5%)  |
|     |        |        | HOMO-2 → LUMO+2 (74.5%) |
|     |        |        | HOMO → LUMO+1 (6.2%)    |
| S10 | 349.87 | 0.0959 | HOMO-4 → LUMO (93.5%)   |
|     |        |        | HOMO-1 → LUMO (5.3%)    |

---
